# Supplementary material for: The N1-suppression effect for self-initiated sounds is independent of attention
Source: PubMed Central journal article supplement (PMC3573961; doi:10.1186/1471-2202-14-2), 2013-01-03

Additional file 2:

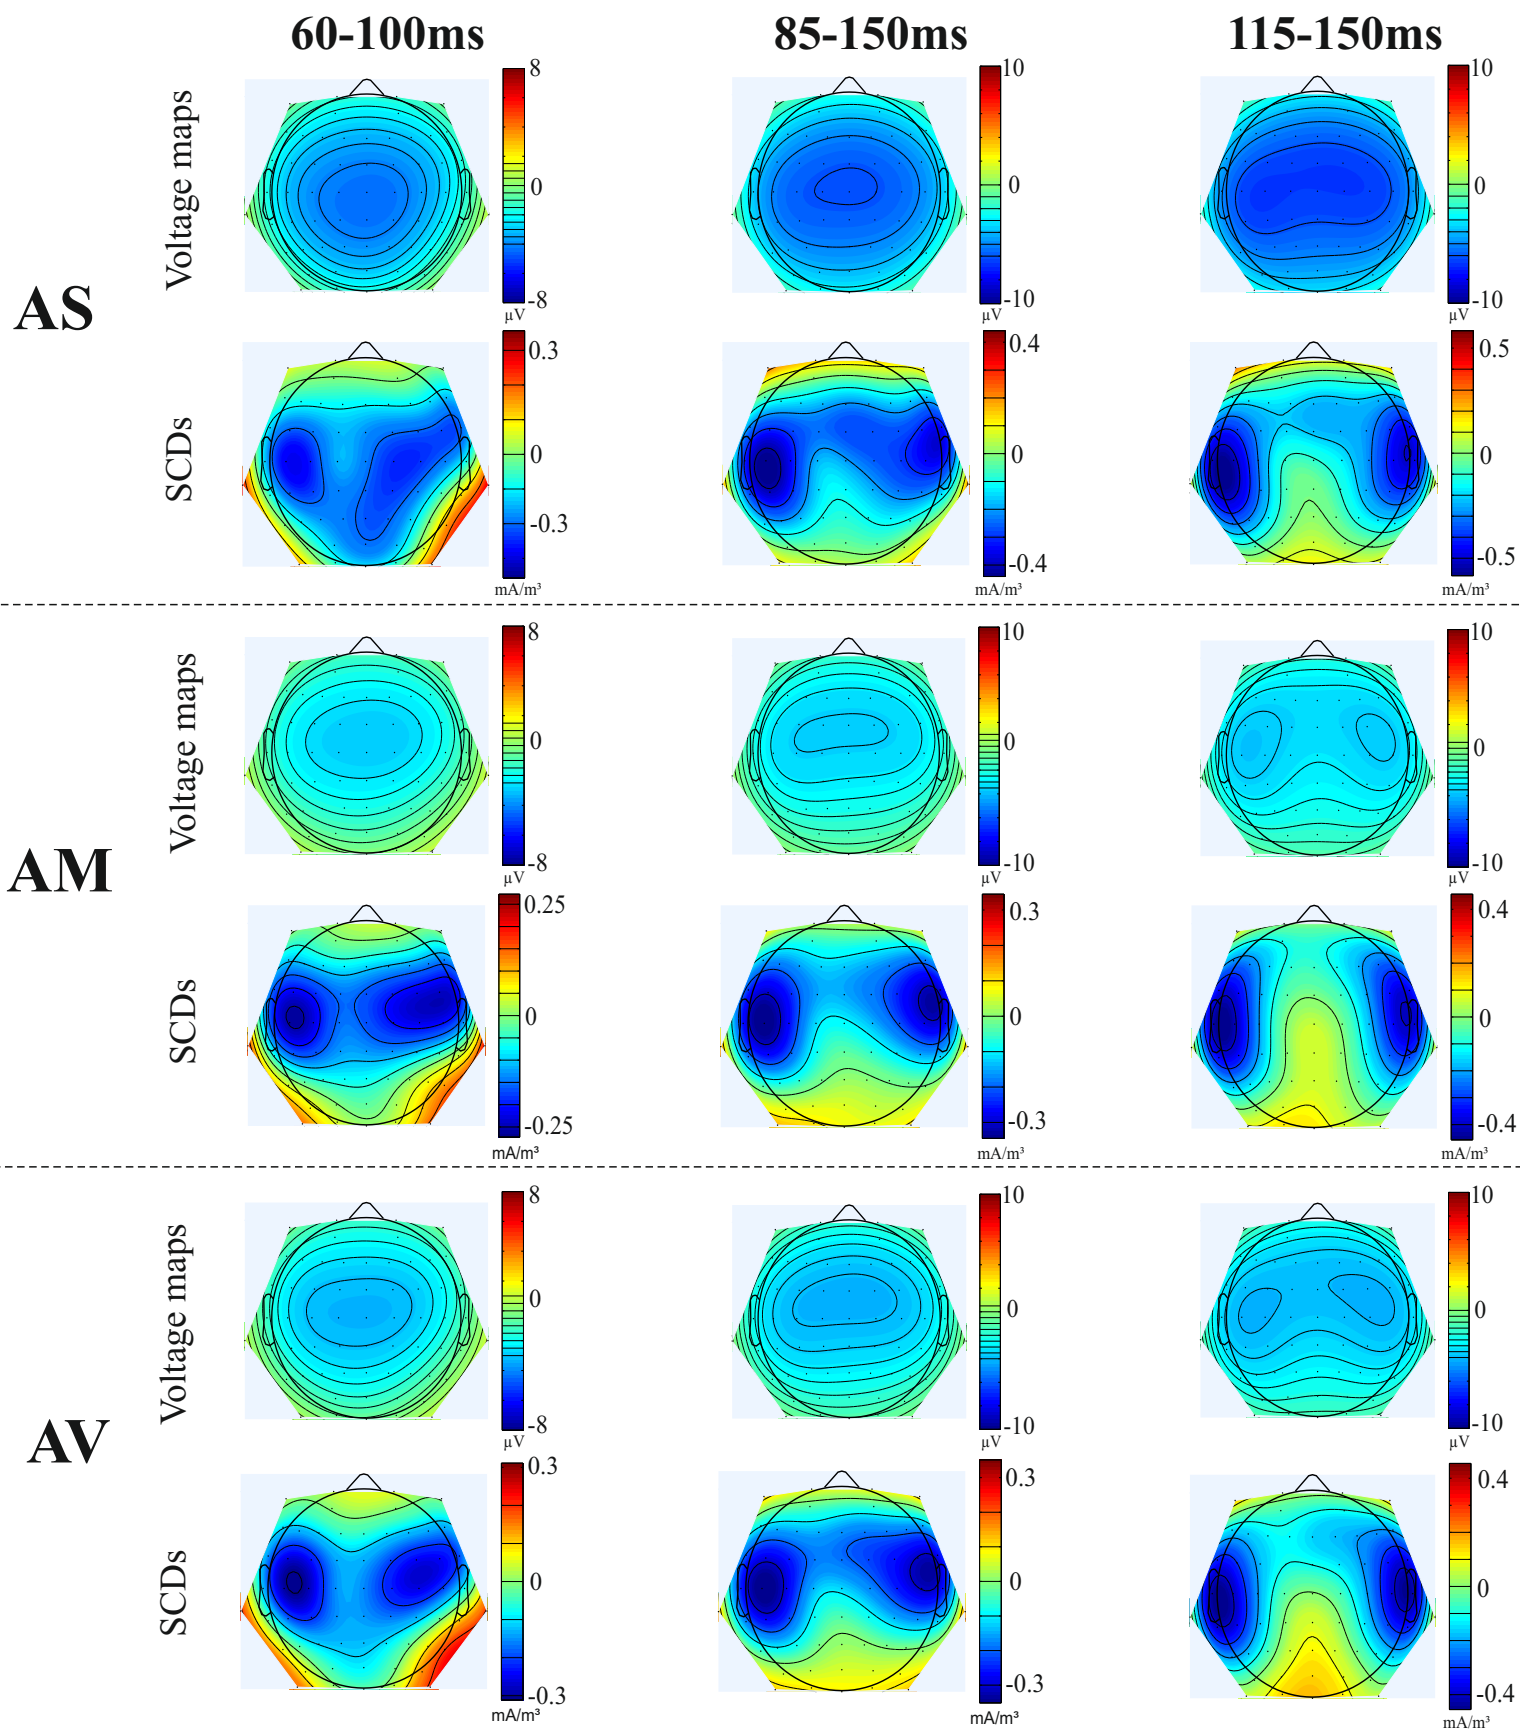

Supplement: 1471-2202-14-2-S2.pdf [file 1471-2202-14-2-S2.pdf]
